# Supplementary material
Source: publisher figshare collection journal article supplement (https://frontiersin.figshare.com/ndownloader/files/13439051)
Supplement: Supplementary file [file 13439051]

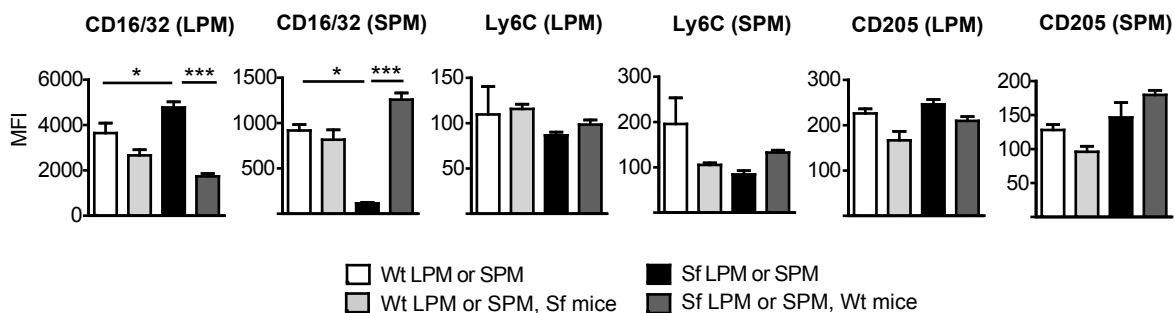

**Supplementary Figure S5.** Immunophenotyping of control (Wt) and scurfy (Sf) large peritoneal macrophages (LPM) and small peritoneal macrophages (SPM), isolated from either non-treated mice or following PM transfer to Sf and Wt mice, respectively. Data are depicted as mean fluorescent intensities (MFI) for each surface marker expressed by single cells (n=28-62 cells per experimental group, each sample contains pooled cells from more than 8 donor mice). Statistical analyses were performed using one-way ANOVA, \* p<0.05, \*\*\* p<0.001.
